# Supplementary material for: Exploration of thyroglobulin as a biomarker of iodine status in iodine-sufficient and mildly iodine-deficient pregnant women
Source: PubMed Central journal article supplement (PMC10349736; doi:10.1007/s00394-023-03131-x), 2023-03-27
Supplement: 394_2023_3131_MOESM1_ESM.pdf [file 394_2023_3131_MOESM1_ESM.pdf]

**Electronic Supplementary Material:****Exploration of thyroglobulin as a biomarker of iodine status in iodine-sufficient and mildly iodine-deficient pregnant women**

Mariana Dineva, Margaret P. Rayman, Deborah Levie, Sandra Hunziker, Mònica Guxens, Robin P. Peeters, Mario Murcia, Marisa Rebagliato, Amaia Irizar, Alba Jimeno-Romero, Jordie Sunyer, Tim I.M. Korevaar, and Sarah C. Bath<sup>a</sup>

<sup>a</sup>**Corresponding author:** Dr Sarah C. Bath, Department of Nutritional Sciences, Faculty of Health and Medical Sciences, University of Surrey, Guildford GU2 7XH, United Kingdom. E-mail: s.bath@surrey.ac.uk

**Table of Contents**

|                                                                                                                                                                                                                                                                                                                |    |
|----------------------------------------------------------------------------------------------------------------------------------------------------------------------------------------------------------------------------------------------------------------------------------------------------------------|----|
| <b>Supplementary Table 1</b> Multiple imputation of missing values.....                                                                                                                                                                                                                                        | 2  |
| <b>Supplementary Table 2</b> Median (25-75 <sup>th</sup> percentiles) serum thyroglobulin concentration (serum-Tg, ng/ml) according to sample characteristics by cohort .....                                                                                                                                  | 3  |
| <b>Supplementary Table 3</b> Socio-demographic and socio-economic determinants <sup>a</sup> of serum thyroglobulin concentration in pregnant women by cohort (adjusted analyses) .....                                                                                                                         | 5  |
| <b>Supplementary Table 4</b> Dietary determinants <sup>a</sup> of serum thyroglobulin concentration in pregnant women by cohort (adjusted analyses).....                                                                                                                                                       | 7  |
| <b>Supplementary Table 5</b> Proportion (unadjusted) of pregnant women with elevated serum thyroglobulin concentration (serum-Tg >55 ng/ml <sup>a</sup> ) and odds (adjusted) of elevated serum-Tg according to food-group intakes and iodine-containing supplement-use by cohort (sensitivity analyses) ..... | 8  |
| <b>Supplementary Table 6</b> Median (25-75 <sup>th</sup> percentiles) serum thyroglobulin concentration (serum-Tg, ng/ml) in pregnant women according to UI/Creat categories by cohort .....                                                                                                                   | 9  |
| <b>Supplementary Table 7</b> Descriptives of UIC and UI/Creat in pregnant women with ‘normal’ vs elevated serum thyroglobulin concentration (serum-Tg >55 ng/ml <sup>a</sup> ) and the proportion with elevated serum-Tg by UI/Creat groups in each cohort (sensitivity analyses) .....                        | 10 |

**Supplementary Table 1** Multiple imputation of missing values

|                                                                                   | <b>Generation R</b> | <b>INMA</b> |
|-----------------------------------------------------------------------------------|---------------------|-------------|
| Total women in the analyses <sup>a</sup>                                          | 3,548               | 1,168       |
| % (n) women with at least one missing value on any relevant variables (see below) | 38.6% (1,370)       | 10.4% (121) |
| % (n) missing values in total                                                     | 7.6% (3,231)        | 1.9% (245)  |
| Relevant variables with imputed data                                              | 9 of 12             | 11 of 11    |
| Number of imputed values per variable                                             |                     |             |
| Maternal age                                                                      | 32                  | 2           |
| Pre-pregnancy BMI                                                                 | 692                 | 1           |
| Ethnicity                                                                         | 182                 | 5           |
| Parity                                                                            | 32                  | 4           |
| Smoking status                                                                    | 432                 | 77          |
| Alcohol consumption                                                               | 471                 | 85          |
| Education level                                                                   | 296                 | 6           |
| Net household income                                                              | 777                 | N/A         |
| Marital status                                                                    | 317                 | N/A         |
| Living with a partner                                                             | N/A                 | 2           |
| Gestational week at urine sampling                                                | 0 <sup>b</sup>      | 1           |
| Gestational week at blood sampling                                                | 0 <sup>b</sup>      | 2           |
| Child's sex                                                                       | 0 <sup>b</sup>      | 60          |

<sup>a</sup> Missing values were identified and multiple imputation was performed for this selected sample.

<sup>b</sup> Data were not imputed due to no missing values for these variables.

**Abbreviations:** BMI, body mass index; N/A, data not available in this cohort

**Supplementary Table 2** Median (25-75<sup>th</sup> percentiles) serum thyroglobulin concentration (serum-Tg, ng/ml) according to sample characteristics by cohort

|                                         | Generation R<br>(n=3,548) |                                  |                       | INMA<br>(n=1,168) |                                  |                       |
|-----------------------------------------|---------------------------|----------------------------------|-----------------------|-------------------|----------------------------------|-----------------------|
|                                         | n                         | Median (25-75 <sup>th</sup> ) Tg | <i>P</i> <sup>a</sup> | n                 | Median (25-75 <sup>th</sup> ) Tg | <i>P</i> <sup>a</sup> |
| <b>Maternal factors</b>                 |                           |                                  |                       |                   |                                  |                       |
| TPO-Ab status                           |                           |                                  | 0.179                 |                   |                                  |                       |
| Negative                                | 3,060                     | 11.2 (7.1 - 17.0)                |                       | N/A               | N/A                              |                       |
| Positive                                | 130                       | 9.4 (4.8 - 20.5)                 |                       | N/A               | N/A                              |                       |
| Ethnicity                               |                           |                                  | <b>&lt;0.001</b>      |                   |                                  | 0.917                 |
| Reference group <sup>b</sup>            | 1,865                     | 11.4 (7.2 - 17.3)                |                       | 1,070             | 11.5 (6.9 - 19.0)                |                       |
| Non-Dutch:                              |                           |                                  |                       |                   |                                  |                       |
| <i>Indonesian</i>                       | 95                        | 10.8 (7.1 - 16.0)                |                       | N/A               | N/A                              |                       |
| <i>Cape Verdean</i>                     | 155                       | 13.6 (7.8 - 18.8)                |                       | N/A               | N/A                              |                       |
| <i>Moroccan</i>                         | 198                       | 10.1 (6.2 - 14.8)                |                       | N/A               | N/A                              |                       |
| <i>Dutch Antilles</i>                   | 114                       | 17.1 (10.6 - 27.9)               |                       | N/A               | N/A                              |                       |
| <i>Surinamese</i>                       | 316                       | 12.1 (7.3 - 18.7)                |                       | N/A               | N/A                              |                       |
| <i>Turkish</i>                          | 300                       | 8.7 (6.0 - 12.9)                 |                       | N/A               | N/A                              |                       |
| <i>Other, Non-Western</i>               | 143                       | 10.5 (6.7 - 15.7)                |                       | N/A               | N/A                              |                       |
| <i>Asian</i>                            | 51                        | 10.1 (7.2 - 15.9)                |                       | N/A               | N/A                              |                       |
| <i>Other, Western</i>                   | 311                       | 10.5 (6.5 - 16.6)                |                       | N/A               | N/A                              |                       |
| Non-Spanish:                            |                           |                                  |                       |                   |                                  |                       |
| <i>Latin-American</i>                   | N/A                       | N/A                              |                       | 67                | 10.9 (7.7 - 17.0)                |                       |
| <i>European/others</i>                  | N/A                       | N/A                              |                       | 31                | 12.3 (5.9 - 19.8)                |                       |
| Parity                                  |                           |                                  | <b>0.002</b>          |                   |                                  | 0.122                 |
| 0                                       | 2,033                     | 11.4 (7.3 - 17.6)                |                       | 639               | 11.0 (6.9 - 18.4)                |                       |
| 1                                       | 1,040                     | 10.9 (6.9 - 16.3)                |                       | 446               | 11.6 (6.9 - 18.7)                |                       |
| ≥ 2                                     | 475                       | 10.5 (6.3 - 16.2)                |                       | 83                | 13.9 (7.5 - 24.8)                |                       |
| Smoking status                          |                           |                                  | <b>&lt;0.001</b>      |                   |                                  | <b>&lt;0.001</b>      |
| Never smoked                            | 2,524                     | 10.7 (6.7 - 16.2)                |                       | 836               | 10.7 (6.3 - 17.4)                |                       |
| Stopped smoking                         | 337                       | 11.0 (7.3 - 17.8)                |                       | 160               | 12.5 (8.0 - 20.9)                |                       |
| Continued smoking                       | 687                       | 13.0 (8.4 - 19.2)                |                       | 172               | 15.8 (9.4 - 26.9)                |                       |
| Alcohol consumption                     |                           |                                  | <b>&lt;0.001</b>      |                   |                                  | <b>0.002</b>          |
| No                                      | 1,650                     | 10.5 (6.7 - 16.3)                |                       | 1,059             | 11.3 (6.7 - 18.4)                |                       |
| Yes                                     | 1,898                     | 11.5 (7.3 - 17.6)                |                       | 109               | 14.8 (8.9 - 23.1)                |                       |
| <b>Markers of socio-economic status</b> |                           |                                  |                       |                   |                                  |                       |
| Education level                         |                           |                                  | 0.694                 |                   |                                  | <b>&lt;0.001</b>      |
| Low                                     | 386                       | 10.9 (6.8 - 16.6)                |                       | 248               | 12.9 (8.5 - 23.3)                |                       |
| Medium                                  | 1,612                     | 11.2 (7.0 - 17.4)                |                       | 464               | 11.4 (6.9 - 18.5)                |                       |
| High                                    | 1,550                     | 11.1 (7.0 - 17.0)                |                       | 456               | 10.8 (6.1 - 17.0)                |                       |

(continued on next page)

**Supplementary Table 2** Median (25-75th percentiles) serum thyroglobulin concentration (serum-Tg, ng/ml) according to sample characteristics by cohort (*continued*)

|                                         | Generation R<br>(n=3,548) |                                  |                       | INMA<br>(n=1,168) |                                  |                       |
|-----------------------------------------|---------------------------|----------------------------------|-----------------------|-------------------|----------------------------------|-----------------------|
|                                         | n                         | Median (25-75 <sup>th</sup> ) Tg | <i>P</i> <sup>a</sup> | n                 | Median (25-75 <sup>th</sup> ) Tg | <i>P</i> <sup>a</sup> |
| <b>Markers of socio-economic status</b> |                           |                                  |                       |                   |                                  |                       |
| Net household income                    |                           |                                  |                       |                   |                                  |                       |
| (€ per month)                           |                           |                                  |                       |                   |                                  |                       |
|                                         |                           |                                  | 0.799                 |                   |                                  |                       |
| Low < €1200                             | 780                       | 11.1 (7.0 - 17.1)                |                       | N/A               | N/A                              |                       |
| Medium €1200-2200                       | 713                       | 11.1 (7.0 - 17.0)                |                       | N/A               | N/A                              |                       |
| High > €2200                            | 2,055                     | 11.1 (7.0 - 17.2)                |                       | N/A               | N/A                              |                       |
| Marital status                          |                           |                                  |                       |                   |                                  |                       |
|                                         |                           |                                  | <0.001                |                   |                                  |                       |
| Married                                 | 1,703                     | 10.8 (6.7 - 16.2)                |                       | N/A               | N/A                              |                       |
| Never-married                           | 1,845                     | 11.4 (7.2 - 18.0)                |                       | N/A               | N/A                              |                       |
| Living with a partner                   |                           |                                  |                       |                   |                                  |                       |
|                                         |                           |                                  |                       |                   |                                  | 0.013                 |
| Yes                                     | N/A                       | N/A                              |                       | 1,157             | 11.4 (6.9 - 18.7)                |                       |
| No                                      | N/A                       | N/A                              |                       | 11                | 20.2 (12.9 - 33.7)               |                       |
| <b>Child factors</b>                    |                           |                                  |                       |                   |                                  |                       |
| Child's sex                             |                           |                                  |                       |                   |                                  |                       |
|                                         |                           |                                  | 0.923                 |                   |                                  | 0.581                 |
| Male                                    | 1,807                     | 11.1 (7.0 - 17.3)                |                       | 587               | 11.5 (6.8 - 18.6)                |                       |
| Female                                  | 1,741                     | 11.1 (7.1 - 16.7)                |                       | 581               | 11.5 (7.1 - 19.6)                |                       |

<sup>a</sup> *P*-values from a Mann-Whitney U test (for two-categorical variables) or a Kruskal-Wallis test (for variables with more than two categories).

<sup>b</sup> Reference group for ethnicity in Generation R (Reference group=Dutch) and in INMA (Reference group=Spanish).

**Abbreviations:** N/A, data not available or not applicable; Tg, thyroglobulin; TPO-Ab, thyroid peroxidase antibody

**Supplementary Table 3** Socio-demographic and socio-economic determinants<sup>a</sup> of serum thyroglobulin concentration in pregnant women by cohort (adjusted analyses)

|                                         | Generation R<br>(n=3,190) |                         |                  | INMA<br>(n=1,168) |                         |                  |
|-----------------------------------------|---------------------------|-------------------------|------------------|-------------------|-------------------------|------------------|
|                                         | n                         | B (95% CI)              | P <sup>b</sup>   | n                 | B (95% CI)              | P <sup>c</sup>   |
| <b>Maternal factors</b>                 |                           |                         |                  |                   |                         |                  |
| Gestational week at blood extraction    | 3,190                     | -0.013 (-0.026, 0.001)  | 0.064            | 1,168             | 0.021 (-0.011, 0.054)   | 0.203            |
| Maternal age, years                     | 3,190                     | 0.006 (-0.000, 0.013)   | 0.058            | 1,168             | -0.013 (-0.029, 0.002)  | 0.084            |
| Pre-pregnancy BMI, kg/m <sup>2</sup>    | 3,190                     | 0.001 (-0.006, 0.008)   | 0.823            | 1,168             | -0.002 (-0.017, 0.012)  | 0.735            |
| TPO-Ab status                           |                           |                         |                  |                   |                         |                  |
| Negative                                | 3,060                     |                         | Ref.             | N/A               |                         | N/A              |
| Positive                                | 130                       | -0.127 (-0.258, 0.005)  | 0.059            | N/A               |                         | N/A              |
| Ethnicity                               |                           |                         |                  |                   |                         |                  |
| Reference group <sup>d</sup>            | 1,690                     |                         | Ref.             | 1,070             |                         | Ref.             |
| Non-Dutch:                              |                           |                         |                  |                   |                         |                  |
| <i>Indonesian</i>                       | 85                        | -0.078 (-0.243, 0.087)  | 0.355            | N/A               |                         | N/A              |
| <i>Cape Verdean</i>                     | 136                       | 0.164 (0.020, 0.307)    | <b>0.026</b>     | N/A               |                         | N/A              |
| <i>Moroccan</i>                         | 175                       | -0.040 (-0.179, 0.100)  | 0.578            | N/A               |                         | N/A              |
| <i>Dutch Antilles</i>                   | 104                       | 0.404 (0.241, 0.567)    | <b>&lt;0.001</b> | N/A               |                         | N/A              |
| <i>Surinamese</i>                       | 279                       | 0.099 (-0.007, 0.206)   | 0.067            | N/A               |                         | N/A              |
| <i>Turkish</i>                          | 271                       | -0.307 (-0.425, -0.188) | <b>&lt;0.001</b> | N/A               |                         | N/A              |
| <i>Other, Non-Western</i>               | 127                       | -0.062 (-0.206, 0.083)  | 0.403            | N/A               |                         | N/A              |
| <i>Asian</i>                            | 45                        | -0.019 (-0.212, 0.249)  | 0.875            | N/A               |                         | N/A              |
| <i>Other, Western</i>                   | 278                       | -0.036 (-0.133, 0.060)  | 0.457            | N/A               |                         | N/A              |
| Non-Spanish:                            |                           |                         |                  |                   |                         |                  |
| <i>Latin-American</i>                   | N/A                       |                         | N/A              | 67                | -0.036 (-0.276, 0.204)  | 0.770            |
| <i>European/others</i>                  | N/A                       |                         | N/A              | 31                | -0.065 (-0.409, 0.279)  | 0.711            |
| Parity                                  |                           |                         |                  |                   |                         |                  |
| 0                                       | 1,833                     |                         | Ref.             | 639               |                         | Ref.             |
| 1                                       | 920                       | -0.082 (-0.144, -0.020) | <b>0.009</b>     | 446               | 0.065 (-0.060, 0.189)   | 0.307            |
| ≥ 2                                     | 437                       | -0.123 (-0.212, -0.035) | <b>0.007</b>     | 83                | 0.169 (-0.065, 0.403)   | 0.157            |
| Smoking status                          |                           |                         |                  |                   |                         |                  |
| Never smoked                            | 2,275                     |                         | Ref.             | 836               |                         | Ref.             |
| Stopped smoking                         | 295                       | 0.024 (-0.071, 0.119)   | 0.620            | 160               | 0.197 (0.015, 0.380)    | <b>0.034</b>     |
| Continued smoking                       | 620                       | 0.248 (0.174, 0.323)    | <b>&lt;0.001</b> | 172               | 0.385 (0.210, 0.560)    | <b>&lt;0.001</b> |
| Alcohol consumption                     |                           |                         |                  |                   |                         |                  |
| No                                      | 1,476                     |                         | Ref.             | 1,059             |                         | Ref.             |
| Yes                                     | 1,714                     | 0.026 (-0.040, 0.091)   | 0.442            | 109               | 0.205 (0.001, 0.410)    | <b>0.049</b>     |
| <b>Markers of socio-economic status</b> |                           |                         |                  |                   |                         |                  |
| Education level                         |                           |                         |                  |                   |                         |                  |
| Low                                     | 343                       |                         | Ref.             | 248               |                         | Ref.             |
| Medium                                  | 1,443                     | -0.012 (-0.113, 0.089)  | 0.815            | 464               | -0.234 (-0.384, -0.083) | <b>0.002</b>     |
| High                                    | 1,404                     | -0.019 (-0.131, 0.094)  | 0.746            | 456               | -0.228 (-0.385, -0.017) | <b>0.004</b>     |

(continued on next page)

**Supplementary Table 3** Socio-demographic and socio-economic determinants<sup>a</sup> of serum thyroglobulin concentration in pregnant women by cohort (adjusted analyses) (*continued*)

|                                                              | Generation R<br>(n=3,190) |                        |                | INMA<br>(n=1,168) |                        |                             |
|--------------------------------------------------------------|---------------------------|------------------------|----------------|-------------------|------------------------|-----------------------------|
|                                                              | n                         | B (95% CI)             | P <sup>b</sup> | n                 | B (95% CI)             | P <sup>c</sup>              |
| <b>Markers of socio-economic status</b> ( <i>continued</i> ) |                           |                        |                |                   |                        |                             |
| Net household income (€ per month)                           |                           |                        |                |                   |                        |                             |
| Low < €1200                                                  | 689                       |                        | Ref.           | N/A               |                        | N/A N/A                     |
| Medium €1200-2200                                            | 636                       | 0.027 (-0.077, 0.132)  | 0.606          | N/A               |                        | N/A N/A                     |
| High > €2200                                                 | 1,865                     | -0.001 (-0.106, 0.104) | 0.987          | N/A               |                        | N/A N/A                     |
| Marital status                                               |                           |                        |                |                   |                        |                             |
| Married                                                      | 1,539                     |                        | Ref.           | N/A               |                        | N/A N/A                     |
| Never-married                                                | 1,651                     | -0.041 (-0.102, 0.021) | 0.194          | N/A               |                        | N/A N/A                     |
| Living with a partner                                        |                           |                        |                |                   |                        |                             |
| Yes                                                          | N/A                       |                        | N/A            | N/A               | 1,157                  | Ref.                        |
| No                                                           | N/A                       |                        | N/A            | N/A               | 11                     | 0.361 (-0.213, 0.935) 0.217 |
| <b>Child factors</b>                                         |                           |                        |                |                   |                        |                             |
| Child's sex                                                  |                           |                        |                |                   |                        |                             |
| Male                                                         | 1,625                     |                        | Ref.           | 587               |                        | Ref.                        |
| Female                                                       | 1,565                     | -0.001 (-0.053, 0.051) | 0.971          | 581               | -0.003 (-0.119, 0.112) | 0.958                       |

<sup>a</sup> Effect estimates (B=unstandardised regression coefficients), their 95% CIs and P-values are from multiple linear regression models performed for each cohort with (natural) log-transformed thyroglobulin (Tg) concentration as the dependent variable and maternal characteristics as independent variables (for full models, see footnotes b and c). Reported B coefficients represent the change in the mean (natural) log of Tg per unit increase in the continuous independent variables and for each category compared to the reference for the categorical independent variables.

<sup>b</sup> Generation R Model ( $R^2=0.038$ ,  $P < 0.0001$ ): gestational week at blood extraction, age (years), pre-pregnancy BMI ( $\text{kg}/\text{m}^2$ ), TPO-Ab status, ethnicity, parity, smoking status, alcohol consumption, education, net household income, marital status and child's sex.

<sup>c</sup> INMA Model ( $R^2=0.043$ ,  $P < 0.0001$ ): gestational week at blood extraction, age (years), pre-pregnancy BMI ( $\text{kg}/\text{m}^2$ ), ethnicity, parity, smoking status, alcohol consumption, education, living with a partner and child's sex.

<sup>d</sup> Reference group of ethnicity in Generation R (Reference group=Dutch) and in INMA (Reference group=Spanish).

**Abbreviations:** BMI, body mass index; 95% CI, confidence interval; N/A, data not available or not applicable; Ref., reference category; Tg, thyroglobulin; TPO-Ab, thyroid peroxidase antibody

**Supplementary Table 4** Dietary determinants<sup>a</sup> of serum thyroglobulin concentration in pregnant women by cohort (adjusted analyses)

| Food group intake (100 g/day)         | Generation R<br>(n=2,768) |                | INMA<br>(n=1,155)   |                |
|---------------------------------------|---------------------------|----------------|---------------------|----------------|
|                                       | B (95% CI)                | P <sup>b</sup> | B (95% CI)          | P <sup>c</sup> |
| Vegetables                            | 0.58 (0.04, 1.15)         | <b>0.037</b>   | -0.11 (-0.79, 0.61) | 0.751          |
| Fruit                                 | -0.16 (-0.48, 0.16)       | 0.322          | 0.23 (-0.18, 0.66)  | 0.272          |
| Nuts and seeds                        | -1.44 (-4.09, 2.14)       | 0.388          | 6.75 (-3.02, 27.06) | 0.234          |
| Potatoes                              | -0.57 (-1.37, 0.30)       | 0.196          | -0.35 (-2.14, 1.76) | 0.727          |
| Legumes                               | -1.06 (-4.46, 4.00)       | 0.632          | -1.62 (-3.92, 1.33) | 0.256          |
| Cereals and cereal products           | -0.20 (-0.87, 0.50)       | 0.562          | 0.49 (-0.91, 2.06)  | 0.512          |
| Cakes, confectionery and added sugar  | -0.46 (-1.38, 0.54)       | 0.356          | 0.99 (-1.80, 4.54)  | 0.520          |
| Added fats <sup>d</sup>               | -0.01 (-0.04, 0.02)       | 0.454          | 0.03 (-0.04, 0.10)  | 0.343          |
| Milk and dairy products               | -0.20 (-0.38, -0.02)      | <b>0.030</b>   | -0.08 (-0.47, 0.33) | 0.701          |
| Meat and meat products                | 0.38 (-0.56, 1.40)        | 0.440          | 1.33 (-0.76, 3.82)  | 0.227          |
| Eggs                                  | -1.24 (-4.03, 2.59)       | 0.481          | 6.51 (-2.94, 25.74) | 0.234          |
| Fish and shellfish                    | -0.13 (-2.47, 2.81)       | 0.920          | 0.41 (-1.70, 2.94)  | 0.726          |
| Condiments and seasoning <sup>d</sup> | -0.06 (-0.14, 0.01)       | 0.105          | -1.40 (-2.82, 0.24) | 0.091          |
| Processed and fried foods             | -0.05 (-0.44, 0.36)       | 0.815          | -0.60 (-1.56, 0.45) | 0.256          |
| Non-alcoholic beverages               | -0.01 (-0.08, 0.06)       | 0.696          | 0.02 (-0.13, 0.18)  | 0.787          |
| Alcoholic beverages                   | -0.22 (-1.72, 1.50)       | 0.787          | -0.53 (-4.20, 4.85) | 0.818          |
| Miscellaneous                         | -1.63 (-3.12, 0.13)       | 0.068          | N/A                 | N/A            |

<sup>a</sup> Effect estimates (B=unstandardised regression coefficients), their 95% CIs and *P*-values are from multiple linear regression models performed for each cohort with (natural) log-transformed thyroglobulin (Tg) concentration as the dependent variable and maternal food-group intakes as independent variables, adjusted for confounders (see footnotes b and c). Reported B coefficients represent the actual change in the geometric mean of Tg (ng/ml) associated with a 100-g increase in intake of a food group (exceptions, see footnote d). B coefficients and their 95% CIs were calculated by back-transformation from logarithmic scale as described previously [1]. Values are adjusted for dietary intake of other food groups, energy intake and other potential confounders (for full models, see footnotes b and c).

<sup>b</sup> Generation R Model ( $R^2=0.032$ ,  $P < 0.0001$ ): all food-group intakes (g/day) + energy (kcal/day) + gestational week at blood extraction, age (years), pre-pregnancy BMI ( $\text{kg}/\text{m}^2$ ), TPO-Ab status, ethnicity, parity, smoking status, alcohol consumption, education, net household income, marital status and child's sex.

<sup>c</sup> INMA Model ( $R^2=0.040$ ,  $P < 0.0001$ ): all food-group intakes (g/day) + energy (kcal/day) + gestational week at blood extraction, age (years), pre-pregnancy BMI ( $\text{kg}/\text{m}^2$ ), ethnicity, parity, smoking status, alcohol consumption, education, living with a partner and child's sex.

<sup>d</sup> Effect size is expressed per 1 g (instead of per 100 g) for added fats and condiments.

**Abbreviations:** BMI, body mass index; 95% CI, confidence interval; N/A, data not available or not applicable; Tg, thyroglobulin; TPO-Ab, thyroid peroxidase antibody

#### References:

1. Dineva M, Rayman MP, Levie D, et al (2019) Similarities and differences of dietary and 707 other determinants of iodine status in pregnant women from three European birth cohorts. Eur J Nutr 59:371–387. <https://doi.org/10.1007/s00394-019-01913-w>

**Supplementary Table 5** Proportion (unadjusted) of pregnant women with elevated serum thyroglobulin concentration (serum-Tg >55 ng/ml<sup>a</sup>) and odds (adjusted) of elevated serum-Tg according to food-group intakes and iodine-containing supplement-use by cohort (sensitivity analyses)

|                                          | Generation R (n=2,768) |           |                       |             |                      |                       | INMA (n=1,155) |              |                       |             |                      |                       |
|------------------------------------------|------------------------|-----------|-----------------------|-------------|----------------------|-----------------------|----------------|--------------|-----------------------|-------------|----------------------|-----------------------|
|                                          | Unadjusted             |           | <i>P</i> <sup>b</sup> | Adjusted    |                      | <i>P</i> <sup>c</sup> | Unadjusted     |              | <i>P</i> <sup>b</sup> | Adjusted    |                      | <i>P</i> <sup>c</sup> |
| n                                        | n (%)                  | n         |                       | OR (95% CI) | n                    |                       | n (%)          | n            |                       | OR (95% CI) |                      |                       |
| <b>Milk intake</b>                       |                        |           | 0.062 <sup>d</sup>    |             |                      |                       |                | <b>0.003</b> |                       |             |                      |                       |
| None                                     | 148                    | 6 (4.1%)  |                       | 135         | Ref                  |                       | 111            | 7 (6.3%)     |                       | 111         | Ref                  |                       |
| ≤ 1 glass (≤ 200 g/day)                  | 1,506                  | 23 (1.5%) |                       | 1,345       | 0.430 (0.153, 1.203) | 0.108                 | 615            | 10 (1.6%)    |                       | 615         | 0.215 (0.076, 0.608) | <b>0.004</b>          |
| > 1 glass (> 200 g/day)                  | 1,114                  | 15 (1.3%) |                       | 1,002       | 0.308 (0.097, 0.975) | <b>0.045</b>          | 429            | 6 (1.4%)     |                       | 429         | 0.134 (0.038, 0.472) | <b>0.002</b>          |
| <b>Fish and shellfish intake</b>         |                        |           | 0.163                 |             |                      |                       |                | 1.000        |                       |             |                      |                       |
| None (0 g/day)                           | 555                    | 13 (2.3%) |                       | 500         | Ref                  |                       | N/A            | N/A          |                       | N/A         | N/A                  |                       |
| Some (> 0 g/day)                         | 2,213                  | 31 (1.4%) |                       | 1,982       | 0.570 (0.267, 1.218) | 0.147                 | N/A            | N/A          |                       | N/A         | N/A                  |                       |
| ≤ 1 portion (≤ 120 g/day)                | N/A                    | N/A       |                       | N/A         | N/A                  | N/A                   | 1,041          | 21 (2.0 %)   |                       | 1,041       | Ref                  |                       |
| > 1 portion (> 120 g/day)                | N/A                    | N/A       |                       | N/A         | N/A                  | N/A                   | 114            | 2 (1.8 %)    |                       | 114         | 1.011 (0.215, 4.745) | 0.989                 |
| <b>Bread intake</b>                      |                        |           | 0.877                 |             |                      |                       |                | N/A          |                       |             |                      |                       |
| ≤ median (≤ 98 g/day)                    | 1,378                  | 21 (1.5%) |                       | 1,221       | Ref                  |                       | N/A            | N/A          |                       | N/A         | N/A                  |                       |
| > median (> 98 g/day)                    | 1,377                  | 23 (1.7%) |                       | 1,249       | 1.510 (0.679, 3.360) | 0.312                 | N/A            | N/A          |                       | N/A         | N/A                  |                       |
| <b>Salt intake (inc. iodised)</b>        |                        |           | N/A                   |             |                      |                       |                | 0.356        |                       |             |                      |                       |
| None (0 g/day)                           | N/A                    | N/A       |                       | N/A         | N/A                  | N/A                   | 374            | 10 (2.7%)    |                       | 374         | Ref                  |                       |
| Some (> 0 g/day)                         | N/A                    | N/A       |                       | N/A         | N/A                  | N/A                   | 781            | 13 (1.7%)    |                       | 781         | 0.593 (0.250, 1.408) | 0.236                 |
| <b>Iodine-supplement use<sup>e</sup></b> |                        |           | N/A                   |             |                      |                       |                | 0.144        |                       |             |                      |                       |
| No                                       | N/A                    | N/A       |                       | N/A         | N/A                  | N/A                   | 631            | 17 (2.7%)    |                       | 631         | Ref                  |                       |
| Yes                                      | N/A                    | N/A       |                       | N/A         | N/A                  | N/A                   | 537            | 7 (1.3%)     |                       | 537         | 0.570 (0.223, 1.457) | 0.240                 |

<sup>a</sup> Cut-off value considered elevated from the laboratory where the Tg measurements were performed (see 'Methods').

<sup>b</sup> *P*-values from a Chi-square test (after Continuity Correction for comparisons in 2x2 tables).

<sup>c</sup> *P*-values from multiple logistic regression models with elevated serum-Tg as the dependent variable (categorised as >55 ng/ml). In Generation R: 1) models with food-group intakes were adjusted for energy intake, gestational week at blood extraction, age, pre-pregnancy BMI, TPO-Ab status, ethnicity, parity, smoking status, alcohol consumption, education, net household income, marital status, and child's sex; and 2) models with iodine-supplement use were not performed (see footnote 'e'). In INMA: 1) models with food-group intakes were adjusted for energy intake, gestational week at blood extraction, age, pre-pregnancy BMI, ethnicity, parity, smoking status, alcohol consumption, education, living with a partner, and child's sex; and 2) models with iodine-supplement use were adjusted for gestational week at blood extraction, age, pre-pregnancy BMI, ethnicity, parity, smoking status, alcohol consumption, and education.

<sup>d</sup> Fisher's Exact Test *P*-value was reported due to some cells (>20%) with expected count < 5.

<sup>e</sup> Data on iodine-supplement use were available only for a sub-sample in Generation R (see 'Methods') and statistical analyses with elevated serum-Tg (i.e., categorical outcome) were not performed in this cohort due to very small numbers; e.g., there was only 1 woman who was an iodine-supplement non-user and had elevated serum-Tg for the models with Tg >55 ng/ml.

**Abbreviations:** BMI, body mass index; 95% CI, confidence interval; N/A, data not available or not applicable; OR, odds ratio; Ref., reference category; Tg, thyroglobulin; TPO-Ab, thyroid peroxidase antibody



**Supplementary Table 6** Median (25-75<sup>th</sup> percentiles) serum thyroglobulin concentration (serum-Tg, ng/ml) in pregnant women according to UI/Creat categories by cohort

|                     | Generation R<br>(n=1,071) |                                  |                       | INMA<br>(n=1,000) |                                  |                       |
|---------------------|---------------------------|----------------------------------|-----------------------|-------------------|----------------------------------|-----------------------|
|                     | n                         | Median (25-75 <sup>th</sup> ) Tg | <i>P</i> <sup>a</sup> | n                 | Median (25-75 <sup>th</sup> ) Tg | <i>P</i> <sup>a</sup> |
| UI/Creat grouping 1 |                           |                                  | <b>0.010</b>          |                   |                                  | <b>&lt;0.001</b>      |
| < 150 µg/g          | 311                       | 12.0 (7.4 - 17.9)                |                       | 513               | 12.8 (7.8 - 21.7)                |                       |
| ≥ 150 µg/g          | 760                       | 10.4 (6.5 - 16.4)                |                       | 487               | 10.4 (6.2 - 16.1)                |                       |
| UI/Creat grouping 2 |                           |                                  | <b>0.028</b>          |                   |                                  | <b>&lt;0.001</b>      |
| < 100 µg/g          | 113                       | 13.2 (7.7 - 19.9)                |                       | 284               | 13.9 (8.3 - 21.7)                |                       |
| 100 - 149 µg/g      | 198                       | 11.6 (7.2 - 16.6)                |                       | 229               | 11.9 (6.9 - 21.2)                |                       |
| 150 - 249 µg/g      | 340                       | 10.2 (6.5 - 16.1)                |                       | 245               | 10.6 (6.1 - 17.4)                |                       |
| ≥ 250 µg/g          | 420                       | 10.6 (6.5 - 16.7)                |                       | 242               | 10.1 (6.4 - 15.4)                |                       |

<sup>a</sup> *P*-values from a Mann-Whitney U test (for two-categorical variables) or a Kruskal-Wallis test (for variables with more than two categories).

**Abbreviations:** Tg, thyroglobulin; UI/Creat, urinary iodine-to-creatinine ratio

**Supplementary Table 7** Descriptives of UIC and UI/Creat in pregnant women with ‘normal’ vs elevated serum thyroglobulin concentration (serum-Tg >55 ng/ml<sup>a</sup>) and the proportion with elevated serum-Tg by UI/Creat groups in each cohort (sensitivity analyses)

|                                                          | Generation R (n=1,071) |                 |             |                 |                       | INMA (n=1,000) |                |             |                |                       |
|----------------------------------------------------------|------------------------|-----------------|-------------|-----------------|-----------------------|----------------|----------------|-------------|----------------|-----------------------|
|                                                          | ‘Normal’ Tg            |                 | Elevated Tg |                 |                       | ‘Normal’ Tg    |                | Elevated Tg |                |                       |
|                                                          | n                      | Tg ≤ 55 ng/ml   | n           | Tg > 55 ng/ml   | <i>P</i> <sup>b</sup> | n              | Tg ≤ 55 ng/ml  | n           | Tg > 55 ng/ml  | <i>P</i> <sup>b</sup> |
| <b>Cut-off &gt; 55 ng/ml<sup>a</sup></b>                 |                        |                 |             |                 |                       |                |                |             |                |                       |
| UIC, µg/L, median (25-75 <sup>th</sup> percentiles)      | 1,058                  | 167 (97 - 285)  | 13          | 141 (98 - 292)  | 0.624                 | 981            | 132 (76 - 223) | 19          | 97 (55 - 135)  | <b>0.027</b>          |
| UI/Creat, µg/g, median (25-75 <sup>th</sup> percentiles) | 1,058                  | 209 (139 - 307) | 13          | 188 (112 - 302) | 0.374                 | 981            | 148 (95 - 247) | 19          | 102 (66 - 142) | <b>0.012</b>          |
| <b>N (%) with ‘normal’ and elevated Tg</b>               |                        |                 |             |                 | 0.539 <sup>c</sup>    |                |                |             |                | <b>0.028</b>          |
| UI/Creat < 150 µg/g                                      | 311                    | 306 (98.4%)     |             | 5 (1.6%)        |                       | 513            | 498 (97.1%)    |             | 15 (2.9%)      |                       |
| UI/Creat ≥ 150 µg/g                                      | 760                    | 752 (98.9%)     |             | 8 (1.1%)        |                       | 487            | 483 (99.2%)    |             | 4 (0.8%)       |                       |

<sup>a</sup> Cut-off value considered elevated from the laboratory where the Tg measurements were performed (see ‘Methods’). For the results with a cut-off for elevated Tg >40 ng/ml (based on previous studies in adults and school-aged children), see Table 5 in the main results.

<sup>b</sup> *P*-values from a Mann-Whitney U test or a Chi-square test (after Continuity Correction for comparisons in 2x2 tables).

<sup>c</sup> Fisher's Exact Test *P*-value reported due to some cells with expected count < 5.

**Abbreviations:** Tg, thyroglobulin; UI/Creat, urinary iodine-to-creatinine ratio; UIC, urinary iodine concentration
